# Supplementary material for: Efficiency of microbial desalination cells in treating wastewater, desalinating saltwater, and generating bioelectricity in Bangladesh
Source: Royal Society of Chemistry journal article supplement (doi:10.1039/d4ra06317a), 2024-01-01
Supplement: d4ra06317a1.pdf [file d4ra06317a1.pdf]

## Efficiency of Microbial Desalination Cells for Treating Wastewater, Desalinating Saltwater, and Generating Bioelectricity in Bangladesh

Sadia Sikder <sup>a</sup>, Mohammad Toha <sup>a</sup>, Md. Mostafizur Rahman <sup>a,b,c\*</sup>, Mahmudul Hasan Sikder <sup>d</sup>

a Department of Environmental Science, Bangladesh University of Professionals, Mirpur, Cantonment, Dhaka 1216, Bangladesh.

(Email: [sadiaaurika@gmail.com](mailto:sadiaaurika@gmail.com))

a Department of Environmental Science, Bangladesh University of Professionals, Mirpur, Cantonment, Dhaka 1216, Bangladesh.

(Email: [mdtoha1092@gmail.com](mailto:mdtoha1092@gmail.com))

b Laboratory of Environmental Health and Ecotoxicology, Department of Environmental Sciences, Jahangirnagar University, Savar, Dhaka 1342, Bangladesh

c Department of Environmental Sciences, Jahangirnagar University, Savar, Dhaka 1342, Bangladesh

(Email: [rahmanmm@juniv.edu](mailto:rahmanmm@juniv.edu))

d Department of Civil Engineering and Environment, Islamic University of Technology, Gazipur, Dhaka, Bangladesh.

(Email: [hasansikder@iut-dhaka.edu](mailto:hasansikder@iut-dhaka.edu))

\*Corresponding Author: [rahmanmm@juniv.edu](mailto:rahmanmm@juniv.edu)

**Table S1. Physicochemical Parameters of Textile and Tannery Wastewater (mean±SD (n=3))**

| SL No. | Parameters | Values             |                    | National Standard of wastewater discharge to Inland Surface Water (ECR'1997, Schedule-10) |
|--------|------------|--------------------|--------------------|-------------------------------------------------------------------------------------------|
|        |            | Textile wastewater | Tannery wastewater |                                                                                           |
| 1      | Color      | Black              | Grayish            | -                                                                                         |
| 2      | pH         | 10.03±0.01         | 6.315±0.0015       | 6-9                                                                                       |
| 3      | TDS (ppt)  | 7.15±1.73          | 9.29±0.095         | 2100                                                                                      |

|   |                    |            |            |       |
|---|--------------------|------------|------------|-------|
| 4 | Turbidity<br>(NTU) | 324±0.1    | 366.67±1.5 | -     |
| 5 | DO (ppm)           | 3.7±0.01   | 4.65±0.017 | 4.5-8 |
| 6 | EC (ms/cm)         | 18.6±0.005 | 12.63±0.19 | 1200  |
| 7 | Salinity (ppt)     | 5.10±0.015 | 7.26±0.01  | -     |
| 8 | BOD (ppm)          | 360±0      | 150±0      | 50    |
| 9 | COD (ppm)          | 854±0      | 1013±0     | 200   |

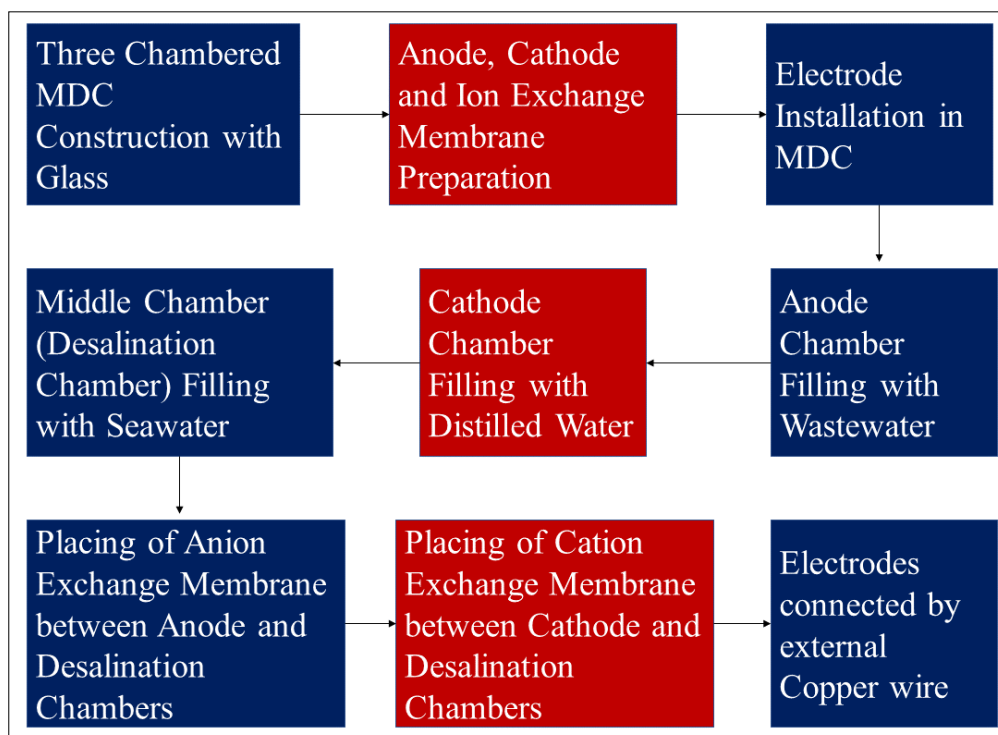

*Fig. S1. MDC Construction Steps*

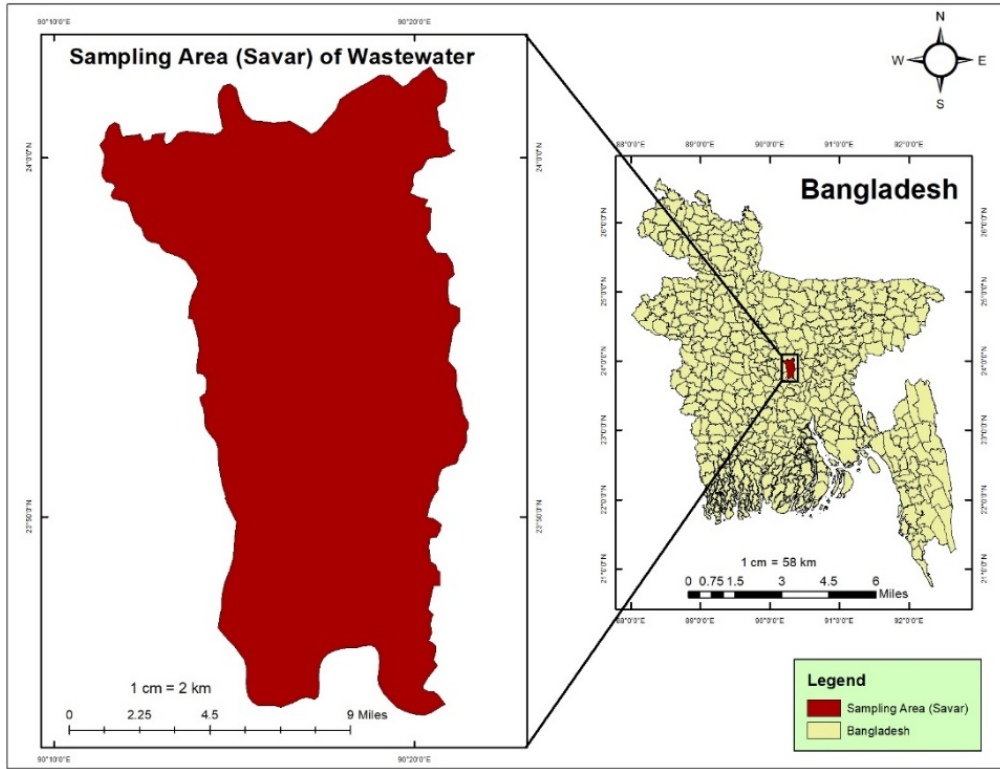

*Fig. S2. Sampling Location of Wastewater.*

## Polarization Curve of MDCs

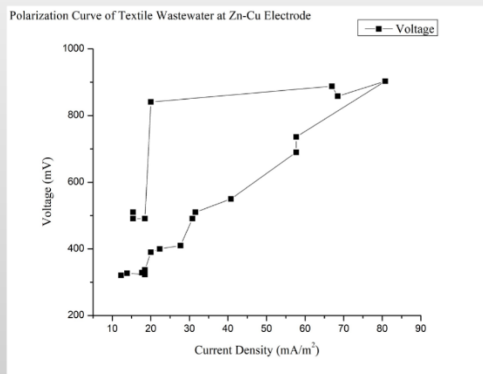

**A**

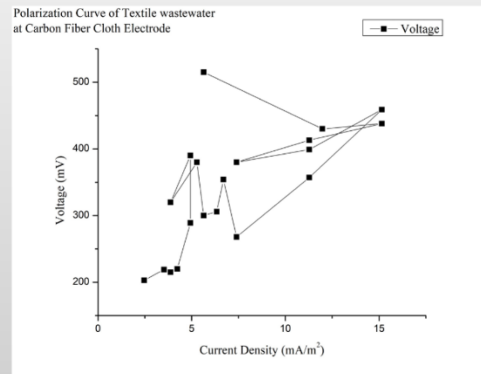

**B**

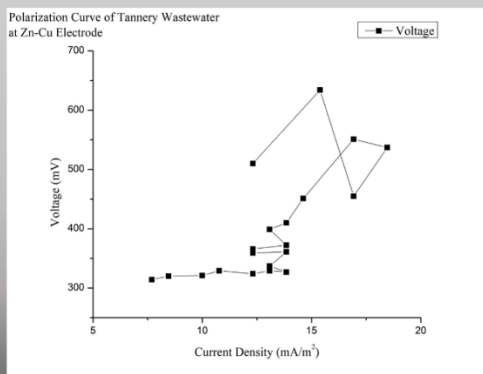

**C**

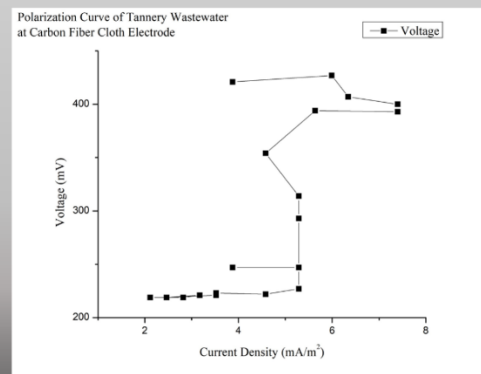

**D**

**Fig. S3. Polarization Curve of MDCs (A) Textile Wastewater Containing Zn-Cu Electrode (B) Textile Wastewater Containing Carbon Fiber Cloth Electrode (C) Tannery Wastewater Containing Zn-Cu Electrode (D) Tannery Wastewater Containing Carbon Fiber Cloth Electrode**
